# Supplementary material for: Climatic consequences of regional nuclear conflicts
Source: Copernicus journal article supplement (doi:10.5194/acp-7-2003-2007), 2007-04-19
Supplement: Supplementary file 1 [file acp-7-2003-2007-supplement.zip]

Supplemental Figure 1. An animation of (left) the globally averaged smoke fraction per model level as a function of height and (right) the vertically averaged smoke optical depth for the first 54 days of one of the ensemble members. (The others give very similar results.) Within the first week the smoke in the troposphere, the lowest atmospheric layer, is lofted or washed out, and the remaining smoke is lofted well into the stratosphere, removed from weather where it can remain for years. The black horizontal line at about 150 mb in the left panel marks the boundary between the troposphere and stratosphere, at about 12 km. The top of the stratosphere (at 50 km) has a pressure of about 1 mb.
